# 1 Asymmetrical template-DNA strand segregation can explain density-associated 2 mutation-rate plasticity

3 Duur K. Aanen\* & Alfons J.M. Debets

4 *Department of Plant Sciences, Laboratory of Genetics, Wageningen University, 6708 PB Wageningen,*  
5 *Netherlands. E-mail: [duur.aanen@wur.nl](mailto:duur.aanen@wur.nl)*

## 6 Summary

7 **The mutation rate is a fundamental factor in evolutionary genetics. Recently, mutation**  
8 **rates were found to be strongly reduced at high density in a wide range of unicellular**  
9 **organisms, prokaryotic and eukaryotic. Independently, cell division was found to**  
10 **become more asymmetrical at increasing density in diverse organisms; in yeast, some**  
11 **'mother' cells continue dividing, while their 'offspring' cells do not divide further. Here,**  
12 **we investigate how this increased asymmetry in cell division at high density can be**  
13 **reconciled with reduced mutation-rate estimates. We calculated the expected number of**  
14 **mutant cells due to replication errors under various modes of segregation of template-**  
15 **DNA strands and copy-DNA strands, both under exponential and under linear growth.**  
16 **We show that the observed reduction in the mutation rate at high density can be**  
17 **explained if mother cells preferentially retain the template-DNA strands, since new**  
18 **mutations are then confined to non-dividing daughter cells thus reducing the spread of**  
19 **mutant cells. Any other inheritance mode results in an *increase* in the number of mutant**  
20 **cells at higher density. The proposed hypothesis that patterns of DNA-strand**  
21 **segregation are density dependent fundamentally challenges our current understanding**  
22 **of mutation-rate estimates and extends the distinction between germline and soma to**  
23 **unicellular organisms.**

24 **Key words:** asymmetrical cell division, density-associated mutation-rate plasticity, germline-  
25 soma distinction, immortal strand hypothesis, mutation rate, unicellular organisms

## 26 1. Introduction

27 Mutation rates are typically minimized, as far as population genetic constraints allow [1].  
28 However, mutation rates can vary, not only between organisms but also with environmental  
29 conditions. A recent study identifies a completely unexpected kind of mutation-rate plasticity  
30 in response to population density [2], which is dependent on quorum sensing [3]. Across a  
31 wide range of unicellular organisms, both eukaryotic and prokaryotic, the mutation rate  
32 consistently was found to decrease with increasing population density, with up to 23-fold  
33 lower mutation rates at high density than at low density. We propose a model that attributes  
34 reduced mutation rate at high density to increased asymmetry in mutation acquisition between  
35 'mother' cells and 'offspring' cells, and discuss recent experimental studies that support this  
36 model.

37 It was long believed that unicellular organisms potentially do not age, thus exhibiting  
38 functional immortality. However, the last two decades have seen increasing evidence for  
39 asymmetrical cell division leading to differential cell fates, even in organisms with

40 morphologically symmetrical division, such as *Escherichia coli* and fission yeast [4, 5]. An  
41 asymmetrical cell division results in a senescing ‘mother’ cell and a rejuvenated ‘daughter’  
42 cell, and fecundity of the mother cell decreases with each division as damaged proteins and  
43 cell components accumulate. There is increasing evidence that such asymmetries during cell  
44 division are not limited to physiological and morphological cell characteristics, but extend to  
45 patterns of DNA strand inheritance, as shown in yeast [6, 7] and *E. coli* [8] and various types  
46 of stem cells [9].

47 The ‘Immortal Strand Hypothesis’ proposes that asymmetries in DNA-strand inheritance  
48 reduce the number of mutations in somatic cells [10]. According to this hypothesis, adult stem  
49 cells have ‘Template Strand Co-segregation’ (TSC [9, 10]), where the daughter cell  
50 maintaining the stem-cell function retains specific ‘master’ templates of the DNA strands of  
51 each chromosome (the parental strands [11]) at each division, while the differentiating  
52 daughter cell receives the new, ‘copy’ strands. Since most mutations during replication occur  
53 in the newly synthesized DNA strands and fewer in the template strands, this asymmetrical  
54 distribution reduces the mutation rate in the stem cells [10]. In support of the immortal strand  
55 hypothesis, TSC during cell division has been demonstrated in a broad range of organisms [9,  
56 12-14], although it is not universal for stem cells and alternative hypotheses have been  
57 proposed to explain it [9, 15].

58 Recently, the degree of asymmetry during cell division was found to be higher at high  
59 density, in independent studies, for budding yeast [16] and for *E. coli* [17]. Furthermore, for  
60 muscle stem cells asymmetry of strand segregation was found to be increased when stem cells  
61 were seeded at higher cell densities [18]. Here we investigate how those findings of increased  
62 asymmetries at high density can be reconciled with reduced estimates of the mutation rate  
63 under that condition [2, 3]. We show that the observed reduction in the mutation rate at high  
64 density can be explained if mother cells preferentially retain the template-DNA strands, since  
65 new mutations are then confined to non-dividing daughter cells thus reducing the spread of  
66 mutant cells.

## 67 **2. Methods**

68 *Calculating the number of mutant cells resulting from a single mutational event.*

69 To establish the effect of the mode of DNA-strand segregation under different modes of cell  
70 division, we calculate the average number of mutant cells when a single copy error occurs  
71 during the formation of a certain number of cells from a single ancestor. For both symmetrical  
72 and asymmetrical cell division, we considered the effect of asymmetries in the distribution of  
73 template-DNA strands and copy-DNA strands between cells. Even though it seems unlikely  
74 that those asymmetries will be absolute, for the sake of argument, we consider deterministic  
75 models for both symmetrical and asymmetrical growth, under three different inheritance  
76 patterns of template DNA and copy-DNA strands by mother and daughter cells (Figure 1): (i)  
77 the copied strands are inherited by the mother cell (copy-strand co-segregation; CSC); (ii) the  
78 template strands are inherited by the mother cell (template-strand co-segregation; TSC); and  
79 (iii) the template and copied strands are inherited randomly between mother and daughter  
80 cells (random strand segregation; RSS). In all cases, we consider mutations due to copy error,

81 the most common class of mutations [19], so mutations occur in the copied strand, and not in  
 82 the template strand. We first show the calculation for the expected number of mutant cells for  
 83 the formation of four cells from a single ancestor, and then for the general case.

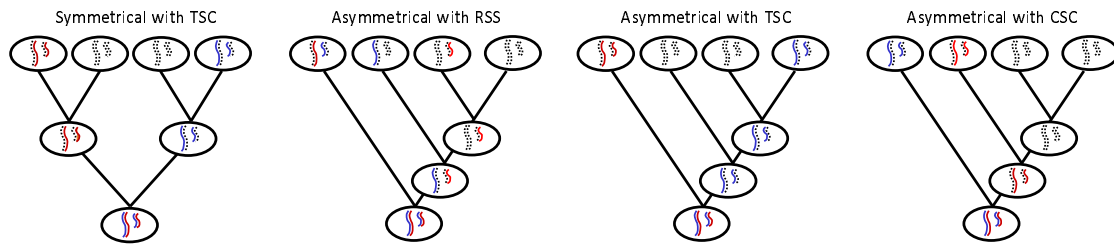

Figure 1. A comparison between symmetrical cell division with template strand co-segregation (TSC; left) and asymmetrical cell division with three forms of DNA-strand inheritance: RSS (center left), TSC (center right) and CSC (right). Following DNA replication, an asymmetrical cell division results in two daughters, one of which becomes a new mother, and the other of which is a rejuvenated cell that stops dividing. According to the ‘immortal strand hypothesis’ the sister chromatids containing the older strands (blue non-dashed) are retained in the continually dividing mother cell. Since the segregation pattern does not influence the number of mutant cells when cell division is symmetrical, symmetrical cell division is only drawn for one type of strand inheritance.

84

85 For symmetrical growth with RSS, the mutation can occur during the first division for which  
 86 there are two routes or the second division, for which there are four routes. In the first case,  
 87 two mutant cells will result, in the second case a single mutant cell. So we get  
 88  $2+2+1+1+1+1=8$  possibilities to get mutant cells and we have six routes for those to occur, so  
 89 on average this yields  $8/6=1.33$  mutant cells. For symmetrical cell division with TSC or CSC,  
 90 the expected number of mutant cells is the same. For  $k$  rounds of symmetrical division (with  
 91 RSS, TSC or CSC), the number of mutant cells produced by a single mutational event can be  
 92 calculated as:  $\frac{k \cdot 2^k}{\sum_{n=1}^k 2^n}$ .

93 For asymmetrical growth with RSS, a single mutation either ends up in a daughter cell (left  
 94 branch), or in the mother cell (right branch). In the first case it will yield a single mutant cell  
 95 only. If the mutation ends in the mother cell, it can either yield three mutant cells (when the  
 96 mutation occurs in the first division), two mutant cells (when the mutation occurs in the  
 97 second division) or a single mutant cell (when the mutation occurs in the third division). The  
 98 average number of mutant cells if the mutation occurs in the mother cell is thus two. So the  
 99 average number of mutant cells resulting from a single mutational event if cells division is  
 100 asymmetrical and strands segregate randomly is  $(1+2)/2=1.5$ . More generally, for  $n$  cells  
 101 formed with asymmetrical cell division, the expected number of mutant cells resulting from a  
 102 single mutational event is  $0.5+0.25n$ .

103 For asymmetrical growth with CSC, a single mutation always is inherited by the right branch.  
 104 Depending on the timing, it can either yield three mutant cells (when the mutation occurs in

105 the first division), two mutant cells (when the mutation occurs in the second division) or a  
106 single mutant cell (when the mutation occurs in the third division). The average number of  
107 mutant cells if the mutation occurs in the mother cell is thus two. More generally, for  $n$  cells  
108 formed with asymmetrical cell division, the expected number of mutant cells resulting from a  
109 single mutational event is  $0.5n$ .

110 For asymmetrical cell division with TSC, the mutation will always end in a non-dividing  
111 daughter cell, and thus only yield a single mutant cell.

### 112 3. Results

113 Consider a culture of unicellular organisms grown at high nutrition (Figure 2). Initially, when  
114 nutrition is not limiting yet, growth will be maximal and exponential [20]. When nutrition  
115 becomes limiting, growth will increasingly become non-exponential (Figure 2a). As has been  
116 shown for yeast at high density, mother cells start to act like stem-cell lineages that continue  
117 budding off rejuvenated offspring cells for their entire replicative lifespan or for the remainder  
118 of it, while the rejuvenated offspring cells are quiescent and do not divide further [21] (Figure  
119 2b). At low nutrition, the transition to non-exponential growth is less strictly associated with  
120 differentiation between mother cells and rejuvenated offspring cells [16-18].

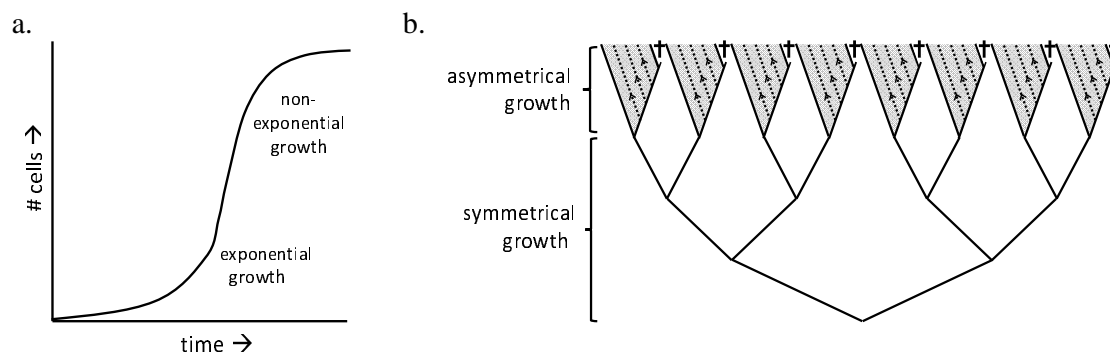

Figure 2. How growth changes from symmetrical exponential to asymmetrical and linear at high density. **a.** Initially, when nutrition is not limiting yet, exponential growth occurs. At higher density the culture is still growing, be it increasingly non-exponentially. **b.** Schematic representation of the shift from exponential to linear growth. At high density, cells increasingly start to divide asymmetrically. Senescing ‘mother’ cells act as stem-cell lineages, continuing to bud off ‘offspring’ cells, which stop dividing.

121

122 To explore the effect of growth mode on the expected number of mutant cells, we considered  
123 the number of mutant cells due to copy errors, which occur in the newly synthesised DNA  
124 strand. For symmetrical growth, this number does not depend on inheritance patterns of DNA  
125 template and copy strands, since all cells continue dividing. However, for asymmetrical  
126 growth, the number of mutant cells is influenced by the inheritance pattern of DNA strands.  
127 To establish this effect, we determined the expected number of mutant cells when a single  
128 copy error occurs during the formation of a certain number of cells, for both symmetrical and

129 asymmetrical growth, under three different inheritance patterns of template and copy-strands  
130 by mother and daughter cells (Figure 1; Methods).

131 For asymmetrical growth, the inheritance pattern has a strong effect on the expected number  
132 of mutant cells. Consider asymmetrical division of a mother cell that can still bud off 31  
133 daughter cells. CSC would then be expected to yield an average of no less than 16 mutant  
134 cells, RSS 8.5, and TSC only a single mutant cell (see Methods and Figure 3 for the  
135 calculation). The latter number is also lower than the number expected with symmetrical  
136 growth, where a single mutation in one of five subsequent rounds of divisions will yield an  
137 average of 2.6 mutant cells among the 32 resulting cells (irrespective of the pattern of  
138 template and copy-strand segregation; Table I).

139 In Table I and Figure 3, the expected number of mutant cells for a single mutational event as a  
140 function of the number of past cell division is given for the four possible combinations of  
141 division and strand segregation. As can be seen, for asymmetrical growth with TSC the  
142 expected number of mutant cells is one, irrespective of the number of cell divisions. In  
143 contrast, for symmetrical growth, the expected number of mutant cells increases with the  
144 number of cell divisions and this is independent of the segregation mode of template and  
145 daughter strands. For asymmetrical growth with RSS and especially with CSC, the number of  
146 mutant cells increases even stronger with the number of cell divisions. For microorganisms  
147 where the maximal replicative lifespan has been determined at some 30 cell divisions [22], a  
148 2.6-fold reduction in the expected number of mutant cells compared to symmetrical division  
149 leading to the same number of cells seems the maximum.

150

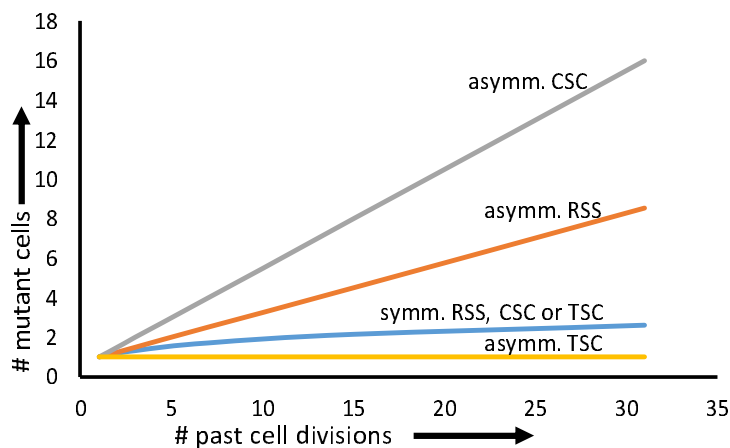

Figure 3. The expected number of mutant cells resulting from a single mutational event as a function of the number of past cell divisions under symmetrical cell division (with CSC, TSC or RSS; blue line; this number can be calculated as  $\frac{k \cdot 2^k}{\sum_{n=1}^k 2^n}$  with  $k$  number of rounds of cell division with symmetrical growth), asymmetrical cell division with CSC (grey line; this number can be calculated as  $0.5n$ , with  $n$  number of cells formed), asymmetrical cell division with RSS (orange line; this number can be calculated as  $0.5+0.25n$ , with  $n$  number of cells formed) and asymmetrical division with TSC (yellow line; always 1, irrespective

of the number of cell divisions). The number of mutant cells under symmetrical division and asymmetrical division with RSS and CSC are all increasing functions of the number of cell divisions and all yield a higher number of mutant cells than asymmetrical division with TSC, which always yields only a single mutant cell, irrespective of the number of cell divisions.

151

152 Table I. The expected numbers of mutant cells if one mutational event occurs during the  
 153 formation of  $n$  cells under symmetrical and asymmetrical cell division, and with either RSS,  
 154 CSC or TSC.

| symmetrical cell division |        |                 |                    | asymmetrical cell division |      |      |         |                 |                      |     |     |
|---------------------------|--------|-----------------|--------------------|----------------------------|------|------|---------|-----------------|----------------------|-----|-----|
|                           |        |                 |                    | RSS                        | CSC  | TSC  |         |                 | RSS                  | CSC | TSC |
| rounds of cell division   | #cells | #past divisions | branch length tree | # expected mutations       |      |      | # cells | #past divisions | # expected mutations |     |     |
| 0                         | 1      | 0               | 1                  | 0                          | 0    | 0    | 1       | 0               | 0                    | 0   | 0   |
| 1                         | 2      | 1               | 2                  | 1                          | 1    | 1    | 2       | 1               | 1                    | 1   | 1   |
| 2                         | 4      | 3               | 6                  | 1.33                       | 1.33 | 1.33 | 4       | 3               | 1.5                  | 2   | 1   |
| 3                         | 8      | 7               | 14                 | 1.71                       | 1.71 | 1.71 | 8       | 7               | 2.5                  | 4   | 1   |
| 4                         | 16     | 15              | 30                 | 2.13                       | 2.13 | 2.13 | 16      | 15              | 4.5                  | 8   | 1   |
| 5                         | 32     | 31              | 62                 | 2.58                       | 2.58 | 2.58 | 32      | 31              | 8.5                  | 16  | 1   |
| 6                         | 64     | 63              | 126                | 3.05                       | 3.05 | 3.05 | 64      | 63              | 16.5                 | 32  | 1   |
| 7                         | 128    | 127             | 254                | 3.53                       | 3.53 | 3.53 | 128     | 127             | 32.5                 | 64  | 1   |
| 8                         | 256    | 255             | 510                | 4.02                       | 4.02 | 4.02 | 256     | 255             | 64.5                 | 128 | 1   |
| 9                         | 512    | 511             | 1022               | 4.51                       | 4.51 | 4.51 | 512     | 511             | 128.5                | 256 | 1   |
| 10                        | 1024   | 1023            | 2046               | 5.00                       | 5.00 | 5.00 | 1024    | 1023            | 256.5                | 512 | 1   |

155

#### 156 4. Discussion

157 Our results show that the empirical finding of a reduced mutation rate at high density can be  
 158 reconciled with increased asymmetry in cell division under that condition if TSC occurs in the  
 159 mother cells, which continue to divide. Asymmetrical cell division with TSC can account for  
 160 a significant reduction in mutation-rate estimates, although not sufficient to fully explain the  
 161 density-dependent mutation-rate plasticity recently reported [2, 3]. However, there is another  
 162 catch when growth shifts from exponential to linear. Estimates of the mutation rate assume  
 163 exponential growth [23]. The fluctuation test takes into account the probability that a mutation  
 164 occurs at an early growth stage, in which case a large proportion of the population will have  
 165 the mutation (a so-called ‘jackpot’). The model proposed here, with linear growth by division  
 166 from a stem-cell mother that retains the template strands will never yield a ‘jackpot’, since  
 167 mutations in the non-exponential phase always occur in terminal branches. This implies that  
 168 the mutation rate will be systematically underestimated, which may account for the remaining  
 169 difference. Furthermore, if asymmetrical growth occurs in the later stages of both low-density  
 170 and high-density conditions, but TSC only at high density, the difference in mutation rate  
 171 between low and high density will further increase (Figure 3).

172 The apparent universality of density-associated mutation-rate plasticity begs for a general  
 173 mechanism. Given the independent evidence for a link between the degree of asymmetrical  
 174 cell division and density in widely divergent organisms as bacteria [17], single-celled

175 eukaryotes [16] and stem cells of multicellular eukaryotes [18], it seems plausible that this  
176 mechanism is based on asymmetrical cell division. The model proposed here is best supported  
177 for yeast. In yeast, at high density, a larger fraction of the cells becomes quiescent, being  
178 arrested in the  $G_0$  phase of the cell cycle [16], and consisting almost exclusively of  
179 rejuvenated quiescent daughter cells with a high capacity to grow when conditions improve  
180 [21]. The remaining cells are heterogeneous and show senescence. In support of a role for  
181 TSC, in yeast asymmetries in kinetochore inheritance have been shown [6], and one study  
182 found support for asymmetrical strand segregation [7], although another study did not [24].  
183 However, the latter study used a low population density, which may account for this  
184 difference.

185 It seems paradoxical that the senescing cell retains the template DNA strands, and thus  
186 acquires the fewest mutations, while the rejuvenated offspring cells receive the copied  
187 strands, and thus any mutant cells. However, as explained above this inheritance pattern  
188 reduces the number of mutants among the rejuvenated cells. Perhaps the strongest argument  
189 in favour of the model proposed in this article is that the mutation rate will be strongly  
190 *increased* and not decreased if DNA strands were inherited randomly when cell division  
191 becomes asymmetrical. Even for the production of 16 rejuvenated cells by a mother cell,  
192 asymmetrical cell division with RSS would yield 4.5 times more mutant cells than  
193 asymmetrical cell division with TSC, and still over two times more than symmetrical division  
194 (Figure 3). The finding of on one hand, a reduction in the mutation rate at high density [2, 3]  
195 and on the other hand, an increase in asymmetrical division at high density [16-18], therefore  
196 makes it plausible that template-strand co-segregation occurs. However, direct evidence for  
197 our model remains to be provided. Recent improvements in the detection of mutations in  
198 single cells may make it feasible to test our hypothesis directly [25, 26]. An intriguing  
199 question is whether our model also applies to density-associated mutation rate plasticity found  
200 in viruses [2]. Since viruses are dependent on their host for genome replication, in the  
201 experiments used to measure the mutation rates at various density, virus density may  
202 correspond to host density, in which case our model may also apply to viral replication. It has  
203 been proposed that the mutation rate of RNA viruses may also depend on their replication  
204 mode, either by exponential replication where copy strands are copied or linear replication  
205 where template strands are used for replication only [27].

206 The plasticity in mutation rate in response to population density implies that numbers of  
207 mutational events per space and time vary much less with final population size than expected  
208 from a fixed mutation rate per cell division. In other words, the total number of cells with  
209 mutations occurring in a high-density and a low-density culture of unicellular organisms are  
210 more similar than expected based on the number of cell divisions that have occurred. This  
211 buffered number of mutant cells per space and time fits remarkably well in an emerging  
212 picture that the mutation rate of organisms is reduced by specific aspects of their growth  
213 mode, not only for vertebrate animals, which set aside germ cells early in development, but  
214 also for organisms that do not. For example, taller, long-lived plants have been found to have  
215 lower rates of molecular evolution per unit time than small plants, implying that the mutation  
216 rates per generation are more similar [28]. In plant meristems, the stem cells from which

217 reproductive organs will develop undergo a minimal number of divisions during plant growth  
218 [29]. Also, the number of cell divisions separating axillary meristems from the central  
219 meristem is minimized [30]. Similarly, in a fungus with an estimated age of more than 1,500  
220 years the number of mutations was much lower than expected, presumably due to an  
221 unknown mechanism to reduce the number of mitotic divisions of cells at the growth front  
222 [31, 32]. In ciliates, a transcriptionally silent germline nucleus is present, whose mutation rate  
223 per cell division is more than an order of magnitude lower than that of other eukaryotes, but,  
224 converted to a per-sexual generation mutation rate, is remarkably similar to that of  
225 multicellular eukaryotes with a similar genome size [33].

226 The realisation that unicellular organisms also have mechanisms to reduce the mutation rate  
227 makes the germline-soma distinction more general than once believed. August Weismann was  
228 the first to distinguish an immortal germline from a disposable soma and argued that  
229 variations within individuals cannot be transmitted to the germline [34]. Leo Buss challenged  
230 Weismann's doctrine, noticing that an early germline sequestration as seen in vertebrates is  
231 rare among multicellular organisms [35]. The recent findings discussed in this paper,  
232 however, revive part of Weismann's doctrine. A picture emerges that germline sequestration  
233 is not limited to some animals, but also occurs in plants, fungi and even unicellular organisms,  
234 although the timing of sequestration may vary between organism groups and with ecological  
235 conditions such as population density.

## 236 **Acknowledgements**

237 We thank Ben Auxier, Gardien de Jong, Marc Maas and Vidyanand Nanjundiah for useful  
238 comments on this manuscript, and Piter Bijma, Hanna Kokko, and Arjan de Visser for useful  
239 comments on an earlier version of it. DKA was supported by the Netherlands Organisation for  
240 Scientific Research (VICI; NWO 86514007).

## 241 **Author contributions**

242 DKA designed the study and wrote the manuscript with input from AJMD.

## 243 **References**

- 244
- 245 1. Drake J.W., Charlesworth B., Charlesworth D., Crow J.F. 1998 Rates of spontaneous mutation. *Genetics*
- 246 **148**(4), 1667-1686.
- 247 2. Krasovec R., Richards H., Gifford D.R., Hatcher C., Faulkner K.J., Belavkin R.V., Channon A., Aston E.,
- 248 McBain A.J., Knight C.G. 2017 Spontaneous mutation rate is a plastic trait associated with population
- 249 density across domains of life. *Plos Biology* **15**(8). (doi:10.1371/journal.pbio.2002731).
- 250 3. Krasovec R., Belavkin R.V., Aston J.A.D., Channon A., Aston E., Rash B.M., Kadirvel M., Forbes S., Knight
- 251 C.G. 2014 Mutation rate plasticity in rifampicin resistance depends on Escherichia coli cell-cell interactions.
- 252 *Nature Communications* **5**. (doi:10.1038/ncomms4742).
- 253 4. Barker M.G., Walmsley R.M. 1999 Replicative ageing in the fission yeast *Schizosaccharomyces pombe*. *Yeast*
- 254 **15**(14), 1511-1518. (doi:10.1002/(sici)1097-0061(199910)15:14<1511::aid-yea482>3.0.co;2-y).
- 255 5. Stewart E.J., Madden R., Paul G., Taddei F. 2005 Aging and death in an organism that reproduces by
- 256 morphologically symmetric division. *Plos Biology* **3**(2), 295-300. (doi:10.1371/journal.pbio.0030045).
- 257 6. Thorpe P.H., Bruno J., Rothstein R. 2009 Kinetochore asymmetry defines a single yeast lineage. *Proceedings*
- 258 *of the National Academy of Sciences of the United States of America* **106**(16), 6673-6678.
- 259 (doi:10.1073/pnas.0811248106).
- 260 7. Williamson D.H., Fennell D.J. 1981 Non-random assortment of sister chromatids in yeast mitosis. In
- 261 *Molecular Genetics in Yeast, Alfred Benson Symposium* (ed. von Wettstein D F.J., Kielland-Brandt M,
- 262 Stenderup M ), pp. 89 -107. Copenhagen, Munksgaard.
- 263 8. White M.A., Eykelenboom J.K., Lopez-Vernaza M.A., Wilson E., Leach D.R.F. 2008 Non-random segregation
- 264 of sister chromosomes in *Escherichia coli*. *Nature* **455**(7217), 1248-1250. (doi:10.1038/nature07282).



- 265 9. Charville G.W., Rando T.A. 2011 Stem cell ageing and non-random chromosome segregation. *Philos Trans R*  
266 *Soc B-Biol Sci* **366**(1561), 85-93. (doi:10.1098/rstb.2010.0279).
- 267 10. Cairns J. 1975 Mutation selection and natural history of cancer. *Nature* **255**(5505), 197-200.  
268 (doi:10.1038/255197a0).
- 269 11. Meselson M., Stahl F.W. 1958 The replication of DNA in *Escherichia coli*. *Proceedings of the National*  
270 *Academy of Sciences* **44**(7), 671-682. (doi:10.1073/pnas.44.7.671).
- 271 12. Gurevich D.B., Nguyen P.D., Siegel A.L., Ehrlich O.V., Sonntag C., Phan J.M.N., Berger S., Ratnayake D.,  
272 Hersey L., Berger J., et al. 2016 Asymmetric division of clonal muscle stem cells coordinates muscle  
273 regeneration in vivo. *Science* **353**(6295), 136-+. (doi:10.1126/science.aad9969).
- 274 13. Rosenber.Rf, Kessel M. 1968 Nonrandom sister chromatid segregation and nuclear migration in hyphae of  
275 *Aspergillus nidulans*. *Journal of Bacteriology* **96**(4), 1208-8.
- 276 14. Snedeker J., Wooten M., Chen X. 2017 The Inherent Asymmetry of DNA Replication. In *Annual Review of*  
277 *Cell and Developmental Biology*, Vol 33 (ed. Schekman R.), pp. 291-318.
- 278 15. Lansdorp P.M. 2007 Immortal strands? Give me a break. *Cell* **129**(7), 1244-1247.  
279 (doi:10.1016/j.cell.2007.06.017).
- 280 16. Leonov A., Feldman R., Piano A., Arlia-Ciommo A., Lutchman V., Ahmadi M., Elsaser S., Fakim H.,  
281 Heshmati-Moghaddam M., Hussain A., et al. 2017 Caloric restriction extends yeast chronological lifespan via  
282 a mechanism linking cellular aging to cell cycle regulation, maintenance of a quiescent state, entry into a  
283 non-quiescent state and survival in the non-quiescent state. *Oncotarget* **8**(41), 69328-69350.  
284 (doi:10.18632/oncotarget.20614).
- 285 17. Lele U.N., Baig U.I., Watve M.G. 2011 Phenotypic Plasticity and Effects of Selection on Cell Division  
286 Symmetry in *Escherichia coli*. *Plos One* **6**(1). (doi:10.1371/journal.pone.0014516).
- 287 18. Shinin V., Gayraud-Morel B., Gomes D., Tajbakhsh S. 2006 Asymmetric division and cosegregation of  
288 template DNA strands in adult muscle satellite cells. *Nature Cell Biology* **8**(7), 677-U669.  
289 (doi:10.1038/ncb1425).
- 290 19. Crow J.F. 2000 The origins patterns and implications of human spontaneous mutation. *Nature Reviews*  
291 *Genetics* **1**(1), 40-47. (doi:10.1038/35049558).
- 292 20. Monod J. 1949 The growth of bacterial cultures. *Annual Review of Microbiology* **3**, 371-394.  
293 (doi:10.1146/annurev.mi.03.100149.002103).
- 294 21. Allen C., Buttner S., Aragon A.D., Thomas J.A., Meirelles O., Jaetao J.E., Benn D., Ruby S.W., Veenhuis M.,  
295 Madeo F., et al. 2006 Isolation of quiescent and nonquiescent cells from yeast stationary-phase cultures.  
296 *Journal of Cell Biology* **174**(1), 89-100. (doi:10.1083/jcb.200604072).
- 297 22. Nystrom T., Liu B.D. 2014 The mystery of aging and rejuvenation - a budding topic. *Current Opinion in*  
298 *Microbiology* **18**, 61-67. (doi:10.1016/j.mib.2014.02.003).
- 299 23. Luria S.E., Delbrück M. 1943 Mutations of bacteria from virus sensitivity to virus resistance. *Genetics* **28**(6),  
300 491-511.
- 301 24. Neff M.W., Burke D.J. 1991 Random segregation of chromatids at mitosis in *Saccharomyces cerevisiae*.  
302 *Genetics* **127**(3), 463-473.
- 303 25. Elez M., Murray A.W., Bi L.J., Zhang X.E., Matic I., Radman M. 2010 Seeing Mutations in Living Cells.  
304 *Current Biology* **20**(16), 1432-1437. (doi:10.1016/j.cub.2010.06.071).
- 305 26. Robert L., Ollion J., Robert J., Song X.H., Matic I., Elez M. 2018 Mutation dynamics and fitness effects  
306 followed in single cells. *Science* **359**(6381), 1283-1286. (doi:10.1126/science.aan0797).
- 307 27. Sardanyes J., Martinez F., Daros J.A., Elena S.F. 2012 Dynamics of alternative modes of RNA replication for  
308 positive-sense RNA viruses. *Journal of the Royal Society Interface* **9**(69), 768-776.  
309 (doi:10.1098/rsif.2011.0471).
- 310 28. Lanfear R., Ho S.Y.W., Davies T.J., Moles A.T., Aarssen L., Swenson N.G., Warman L., Zanne A.E., Allen  
311 A.P. 2013 Taller plants have lower rates of molecular evolution. *Nature Communications* **4**.  
312 (doi:10.1038/ncomms2836).
- 313 29. Heidstra R., Sabatini S. 2014 Plant and animal stem cells: similar yet different. *Nature Reviews Molecular*  
314 *Cell Biology* **15**(5), 301-312. (doi:10.1038/nrm3790).
- 315 30. Burian A., de Reuille P.B., Kuhlemeier C. 2016 Patterns of Stem Cell Divisions Contribute to Plant Longevity.  
316 *Current Biology* **26**(11), 1385-1394. (doi:10.1016/j.cub.2016.03.067).
- 317 31. Aanen D.K. 2014 DEVELOPMENTAL BIOLOGY How a long-lived fungus keeps mutations in check. *Science*  
318 **346**(6212), 922-923. (doi:10.1126/science.1261401).
- 319 32. Anderson J.B., Catona S. 2014 Genomewide mutation dynamic within a long-lived individual of *Armillaria*  
320 *gallica*. *Mycologia* **106**(4), 642-648.
- 321 33. Sung W., Tucker A.E., Doak T.G., Choi E., Thomas W.K., Lynch M. 2012 Extraordinary genome stability in  
322 the ciliate *Paramecium tetraurelia*. *Proceedings of the National Academy of Sciences of the United States of*  
323 *America* **109**(47), 19339-19344. (doi:10.1073/pnas.1210663109).
- 324 34. Weismann A. 1893 *The germ-plasm: a theory of heredity*. New York, Charles Scribner's sons.
- 325 35. Buss L.W. 1983 Evolution, development and the units of selection. *Proceedings of the National*  
326 *Academy of Sciences of the United States of America-Biological Sciences* **80**(5), 1387-1391.  
327 (doi:10.1073/pnas.80.5.1387).
